# Supplementary material
Source: PubMed Central journal article supplement (PMC7658868)
Supplement: 19-01320.pdf [file 19-01320.pdf]

**On-line Table: Scan protocols**

|                              | 3T MR Imaging         | 7T MR Imaging         |
|------------------------------|-----------------------|-----------------------|
| TIWI                         | 3D FFE                | MPRAGE                |
| TE                           | 4.6 ms                | 2.1 ms                |
| TR                           | 9.4 ms                | 8.0 ms                |
| Flip angle                   | 8°                    | 8°                    |
| Section thickness            | 2.0 mm                | 0.9 mm                |
| T2WI                         | Single-shot TSE       | Single-shot TSE       |
| TE                           | 90 ms                 | 292 ms                |
| TR                           | 15,000 ms             | 2700 ms               |
| Flip angle                   | 90°                   | 90°                   |
| Section thickness            | 2.0 mm                | 1.5 mm                |
| SWI                          | FFE EPI               | 3D-FFE EPI            |
| TE                           | 30 ms                 | 18.7 ms               |
| TR                           | 53 ms                 | 28 ms                 |
| Flip angle                   | 15°                   | 14°                   |
| Section thickness            | 2.0 mm                | 8.0 mm                |
| EPI factor                   | 3                     | 3                     |
| Reconstruction voxel         | 0.31 × 0.31 × 1.00 mm | 0.55 × 0.55 × 0.27 mm |
| MRA                          | MRA-3D                | 3D-Inflow             |
| TE                           | 4.0 ms                | 2.8 ms                |
| TR                           | 21.0 ms               | 10.6 ms               |
| Flip angle                   | 20°                   | 20°                   |
| Reconstruction voxel         | 0.19 × 0.18 × 0.50 mm | 0.30 × 0.30 × 0.20 mm |
| MRV                          | 3D-PCA                | 3D-PCA                |
| TE                           | 19 ms                 | 6.4 ms                |
| TR                           | 8 ms                  | 10 ms                 |
| Flip angle                   | 10°                   | 10°                   |
| Reconstruction voxel         | 0.45 × 0.45 × 1.00 mm | 0.75 × 0.75 × 0.45 mm |
| Velocity (velocity encoding) | 7 cm/s                | 7 cm/s                |
| Single-voxel MR spectroscopy | PRESS                 | sLaser                |
| TE                           | 35 ms                 | 36 ms                 |
| TR                           | 2000 ms               | 5000 ms               |
| Phase cycles                 | 16                    | 16                    |
| No. of averages              | 64                    | 64                    |
| Spectral bandwidth           | 2000 Hz               | 4000 Hz               |
| No. of samples               | 1024                  | 2048                  |

**Note:**—FFE indicates fast-field echo; PRESS, point-resolved spectroscopy sequence; sLaser, semi-Laser; PCA, phase contrast angiography.
